# Supplementary material for: Association between Chronic Environmental Lead (Pb) Exposure and Cytokines in Males and Females of Reproductive Age from Kabwe, Zambia
Source: MDPI journal article supplement (doi:10.3390/ijerph20085596), 2023-04-20
Supplement: s1 [file s1]

# Association between Chronic Environmental Lead (Pb) Exposure and Cytokines in Males and Females of Reproductive Age from Kabwe, Zambia

Andrew Kataba <sup>1,2</sup>, Yared Beyene Yohannes <sup>1,3</sup>, Hokuto Nakata <sup>1</sup>, John Yabe <sup>2,4</sup>, Haruya Toyomaki <sup>1</sup>, Kaampwe Muzandu <sup>2</sup>, Golden Zyambo <sup>2</sup>, Yoshinori Ikenaka <sup>1,5,6,7</sup>, Kennedy Choongo <sup>2</sup>, Mayumi Ishizuka <sup>1,\*</sup> and Shouta M. M. Nakayama <sup>1,2,\*</sup>

<sup>1</sup> Laboratory of Toxicology, Department of Environmental Veterinary Sciences, Faculty of Veterinary Medicine, Hokkaido University, Kita 18 Nishi 9, Kita-ku, Sapporo 060-0818, Japan

<sup>2</sup> School of Veterinary Medicine, The University of Zambia, Lusaka P.O. Box 32379, Zambia

<sup>3</sup> Department of Chemistry, College of Natural and Computational Science, University of Gondar, Gondar P.O. Box 196, Ethiopia

<sup>4</sup> School of Veterinary Medicine, University of Namibia, Windhoek P/B. 13301, Namibia

<sup>5</sup> Water Research Group, School of Environmental Sciences and Development, North-West University, Potchefstroom 2531, South Africa

<sup>6</sup> Translational Research Unit, Veterinary Teaching Hospital, Faculty of Veterinary Medicine, Hokkaido University, Sapporo 060-0818, Japan

<sup>7</sup> One Health Research Center, Hokkaido University, Sapporo 060-0818, Japan

\* Correspondence: ishizum@vetmed.hokudai.ac.jp (M.I.); shoutanakayama0219@gmail.com or shouta-nakayama@vetmed.hokudai.ac.jp (S.M.M.N.); Tel.: +81-11-706-6949 (M.I.); +81-11-706-5105 (S.M.M.N.); Fax: +81-11-706-5105 (M.I. & S.M.M.N.)

The supplementary data as contained in Tables S1 and S2 shows the loading matrix for the Principal Component Analysis (PCA) and the Correlations as estimated by the Row-wise method, respectively.

**Table S1.** Loading matrix for the PCA analysis.

| Variable                 | PC1 (27.6%)   | PC2 (24.4%)   |
|--------------------------|---------------|---------------|
| Age (yrs)                | <b>0.447</b>  | <b>0.526</b>  |
| BLL (µg/dL)              | <b>0.486</b>  | <b>-0.518</b> |
| TNF-α (pg/mL)            | <b>-0.680</b> | 0.323         |
| IL-8 (pg/mL)             | <b>-0.585</b> | 0.075         |
| BMI (kg/m <sup>2</sup> ) | 0.370         | <b>0.758</b>  |

BMI (Body Mass Index), IL-8 (Interleukin-8), TNF-α (Tumor necrosis factor alpha), BLL (Blood Lead Level). PC1 (Principal component 1), PC2 (Principal component 2). The values in bold represent variables with significant contributions to the respective principal components.

**Table S2.** Correlations estimated by a Row-wise Method.

| Variables     | Age<br>(yrs) | BLL<br>( $\mu\text{g/dL}$ ) | TNF- $\alpha$<br>(pg/mL) | IL-8<br>(pg/mL) | BMI<br>(kg/m <sup>2</sup> ) |
|---------------|--------------|-----------------------------|--------------------------|-----------------|-----------------------------|
| Age           | 1.000        | 0.093                       | -0.052                   | 0.003           | <b>0.244</b>                |
| BLL           | 0.091        | 1.000                       | <b>-0.210</b>            | -0.078          | -0.124                      |
| TNF- $\alpha$ | -0.052       | <b>-0.210</b>               | 1.000                    | <b>0.206</b>    | -0.030                      |
| IL-8          | 0.003        | -0.078                      | <b>0.206</b>             | 1.000           | -0.121                      |
| BMI           | <b>0.244</b> | -0.124                      | -0.021                   | -0.121          | 1.000                       |

BMI (Body Mass Index), IL-8 (Interleukin-8), TNF- $\alpha$  (Tumor necrosis factor alpha), BLL (Blood Lead Level). The values in bold represent variables with significant correlation estimated by the Row-wise method.
